# Supplementary figures and images for: The effect of quercetin delivery system on osteogenesis and angiogenesis under osteoporotic conditions
Source: Royal Society of Chemistry journal article supplement (doi:10.1039/c6tb02312f), 2016-12-05

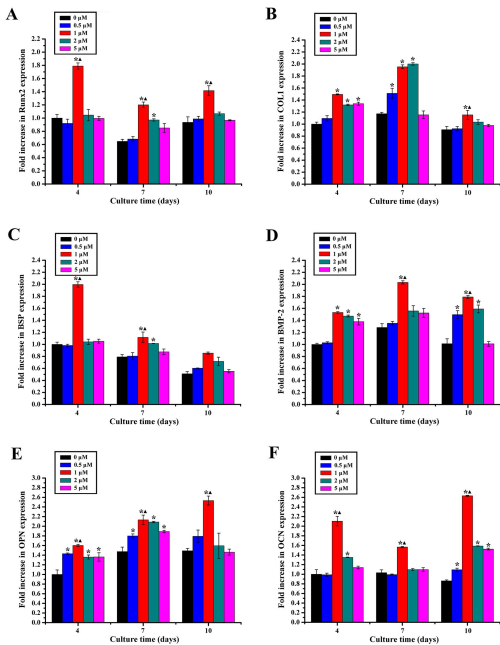

Supplement: c6tb02312f2.pdf [file c6tb02312f2.pdf]

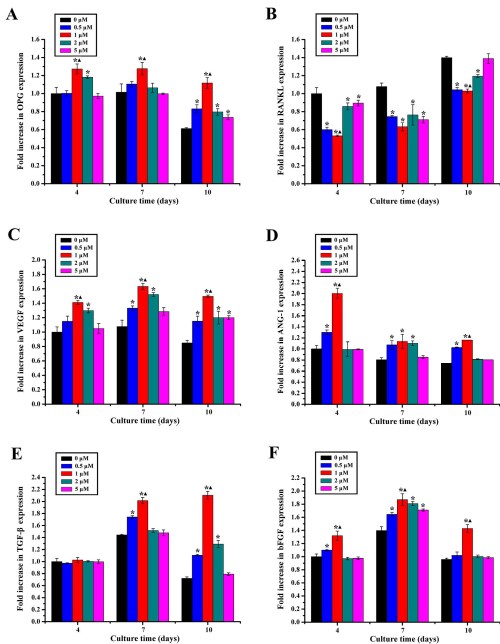

Supplement: c6tb02312f3.pdf [file c6tb02312f3.pdf]
